# Supplementary material
Source: PubMed Central journal article supplement (PMC2453720)
Supplement: 0801328105_0801328105SI.pdf [file 0801328105_0801328105SI.pdf]

# Supporting information

Stat et al. 10.1073/pnas.0801328105

Table S1. Corrected maximum-likelihood pairwise genetic distances between *Symbiodinium* clades and other dinoflagellates

|                     | Clade A | Clade B | Clade C | Clade D | Clade E | <i>G. beii</i> | <i>G. simplex</i> | <i>P. glacialis</i> | <i>T. heimii</i> |
|---------------------|---------|---------|---------|---------|---------|----------------|-------------------|---------------------|------------------|
| Clade A             | 0.026   |         |         |         |         |                |                   |                     |                  |
| Clade B             | 0.115   | 0.012   |         |         |         |                |                   |                     |                  |
| Clade C             | 0.115   | 0.057   | 0.051   |         |         |                |                   |                     |                  |
| Clade D             | 0.099   | 0.047   | 0.061   | 0.023   |         |                |                   |                     |                  |
| Clade E             | 0.107   | 0.102   | 0.115   | 0.100   | 0.009   |                |                   |                     |                  |
| <i>G. beii</i>      | 0.061   | 0.071   | 0.068   | 0.072   | 0.091   |                |                   |                     |                  |
| <i>G. simplex</i>   | 0.064   | 0.071   | 0.072   | 0.067   | 0.088   | 0.030          |                   |                     |                  |
| <i>P. glacialis</i> | 0.081   | 0.090   | 0.093   | 0.089   | 0.105   | 0.034          | 0.043             |                     |                  |
| <i>T. heimii</i>    | 0.153   | 0.137   | 0.140   | 0.124   | 0.157   | 0.105          | 0.091             | 0.093               |                  |
| <i>C. halii</i>     | 0.163   | 0.142   | 0.145   | 0.129   | 0.154   | 0.098          | 0.097             | 0.096               | 0.036            |
